# Supplementary material for: Cellular and humoral immune responses following SARS-CoV-2 mRNA vaccination in patients with multiple sclerosis on anti-CD20 therapy
Source: PubMed Central journal article supplement (PMC8604727; doi:10.1038/s41591-021-01507-2), 2021-09-14
Supplement: 41591_2021_1507_MOESM1_ESM.pdf [file 41591_2021_1507_MOESM1_ESM.pdf]

---

**Supplementary information**

---

**Cellular and humoral immune responses following SARS-CoV-2 mRNA vaccination in patients with multiple sclerosis on anti-CD20 therapy**

---

In the format provided by the authors and unedited

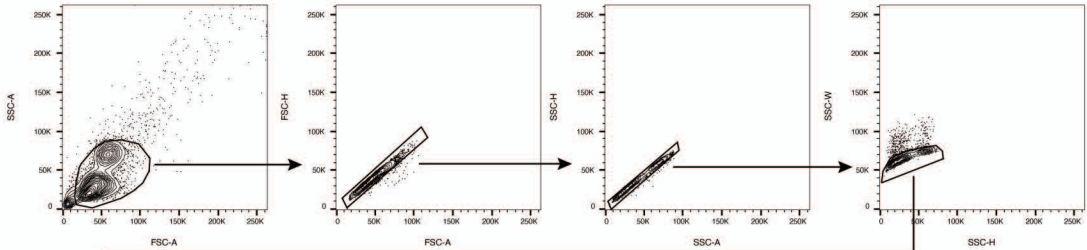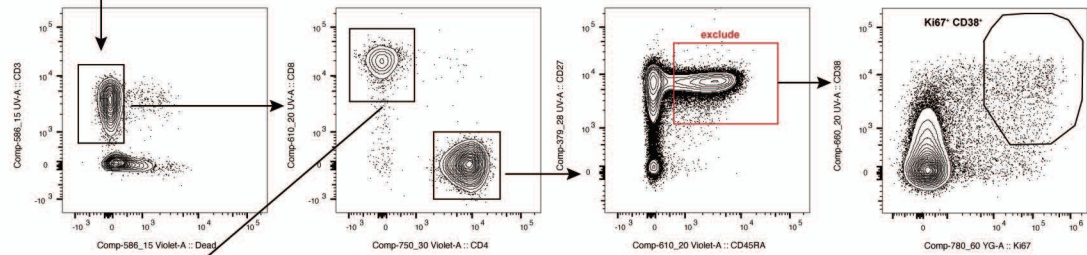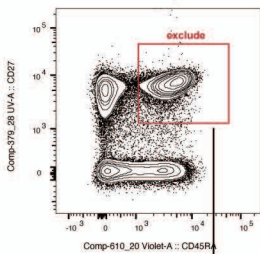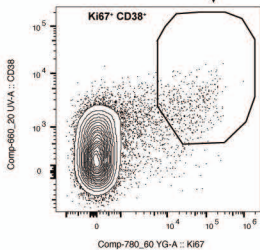

# Spike and RBD serologies in MS-aCD20 patients

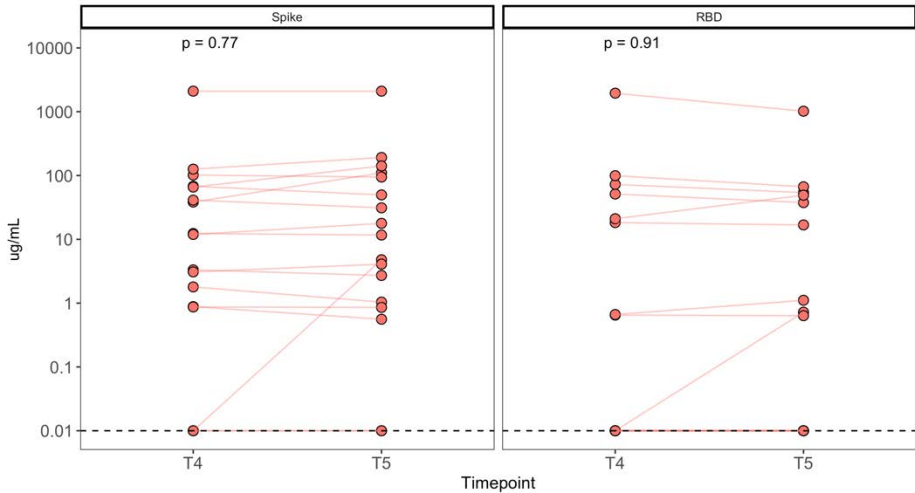

**Supplementary Table 1.**

| Antigen-specific memory B cells | Timepoint | Comparison     | p - value | method   |
|---------------------------------|-----------|----------------|-----------|----------|
| Spike <sup>+</sup>              | T2        | HC vs MS-aCD20 | 9.20E-06  | Wilcoxon |
| Spike <sup>+</sup>              | T3        | HC vs MS-aCD20 | 1.10E-05  | Wilcoxon |
| Spike <sup>+</sup>              | T4        | HC vs MS-aCD20 | 2.60E-05  | Wilcoxon |
| Spike <sup>+</sup>              | T5        | HC vs MS-aCD20 | 1.10E-05  | Wilcoxon |
| RBD <sup>+</sup>                | T2        | HC vs MS-aCD20 | 5.50E-06  | Wilcoxon |
| RBD <sup>+</sup>                | T3        | HC vs MS-aCD20 | 3.30E-06  | Wilcoxon |
| RBD <sup>+</sup>                | T4        | HC vs MS-aCD20 | 1.50E-05  | Wilcoxon |
| RBD <sup>+</sup>                | T5        | HC vs MS-aCD20 | 8.70E-06  | Wilcoxon |

**Supplementary Table 2.**

| <b>Antibody reactivity</b> | <b>Fluorochrome Conjugation</b> | <b>Clone</b> | <b>Supplier</b> | <b>Catalog #</b> | <b>Dilution</b> |
|----------------------------|---------------------------------|--------------|-----------------|------------------|-----------------|
| CD27                       | BUV 395                         | L128         | BD              | 563815           | 1:200           |
| CD71                       | BUV 496                         | M-A712       | BD              | 750652           | 1:50            |
| CD3                        | BUV 563                         | UCHT1        | BD              | 748569           | 1:200           |
| CD8                        | BUV 615                         | RPA-T8       | BD              | 751518           | 1:1600          |
| CD38                       | BUV 661                         | HIT2         | BD              | 612969           | 1:200           |
| CCR6                       | BUV 737                         | 11A9         | BD              | 612780           | 1:100           |
| HLA-DR                     | BUV 805                         | G46-6        | BD              | 748338           | 1:200           |
| CTLA4                      | BV 421                          | BNI3         | BD              | 562743           | 1:100           |
| PD-1                       | BV 480                          | EH12.11      | BD              | 566112           | 1:50            |
| CCR7                       | BV 510                          | G043H7       | Biologend       | 353232           | 1:100           |
| Zombie Yellow              | BV 570                          | -            | Biologend       | 423103           | 1:500           |
| CD45RA                     | BV 605                          | HI100        | Biologend       | 304134           | 1:100           |
| CD25                       | BV 650                          | M-A251       | BD              | 563719           | 1:100           |
| CXCR3                      | BV 711                          | G025H7       | Biologend       | 353732           | 1:100           |
| CD4                        | BV 750                          | SK3          | BD              | 566355           | 1:2000          |
| ICOS                       | BV 785                          | C398.4A      | Biologend       | 313534           | 1:50            |
| SLAM                       | AF 488                          | A12 (7D4)    | Biologend       | 306312           | 1:50            |
| CD127                      | BB 700                          | HIL-7R-M21   | BD              | 566398           | 1:100           |
| CXCR4                      | PE-Cy5                          | 12G5         | Biologend       | 306508           | 1:500           |
| FoxP3                      | PE-Cy5.5                        | PCH101       | Fisher          | 35-4776-42       | 1:50            |
| Ki67                       | PE-Cy7                          | B56          | BD              | 561283           | 1:400           |
| T-bet                      | AF 647                          | 4B10         | Biologend       | 644804           | 1:200           |
| CXCR5                      | APC-R700                        | RF8B2        | BD              | 565191           | 1:50            |
| Bcl-6                      | APC-Cy7                         | K112-91      | BD              | 563581           | 1:100           |
